# Supplementary material for: Innovative Application of Polyether Amine as a Recyclable Catalyst in Aerobic Thiophenol Oxidation
Source: MDPI journal article supplement (doi:10.3390/org5020005), 2024-04-26

Supplementary Materials

# Innovative Application of Polyether Amine as a Recyclable Catalyst in Aerobic Thiophenol Oxidation

Lingxia Chen <sup>1</sup>, Junyu Li <sup>1</sup>, Ke Ni <sup>1</sup>, Xinshu Qin <sup>1</sup>, Lijun Wang <sup>1</sup>, Jiaman Hou <sup>1</sup>, Chao Wang <sup>1</sup>, Xuan Li <sup>1</sup>, Minlong Wang<sup>1</sup>, Jie An <sup>1,\*</sup>

<sup>1</sup> Department of Nutrition and Health, China Agricultural University, Beijing, 100083, China; SY20233313721@cau.edu.cn (L.X.C.); SY20213313325@cau.edu.cn (J.Y.L.); ke.ni@pepperdine.edu (K.N.); b20233311203@cau.edu.cn (X.S.Q.); lijunwang@cau.edu.cn (L.J.W.); sy20223313563@cau.edu.cn (J.M.H.); b20233311213@cau.edu.cn (C.W.); SY20233313716@cau.edu.cn (X.L.); mlwang@cau.edu.cn (M.L.W.)

\* Correspondence: jie\_an@cau.edu.cn

<sup>1</sup>H NMR and <sup>13</sup>C{<sup>1</sup>H} NMR spectra of **2a-2p**: Page 2-17

$^1\text{H}$  NMR and  $^{13}\text{C}\{^1\text{H}\}$  NMR spectra

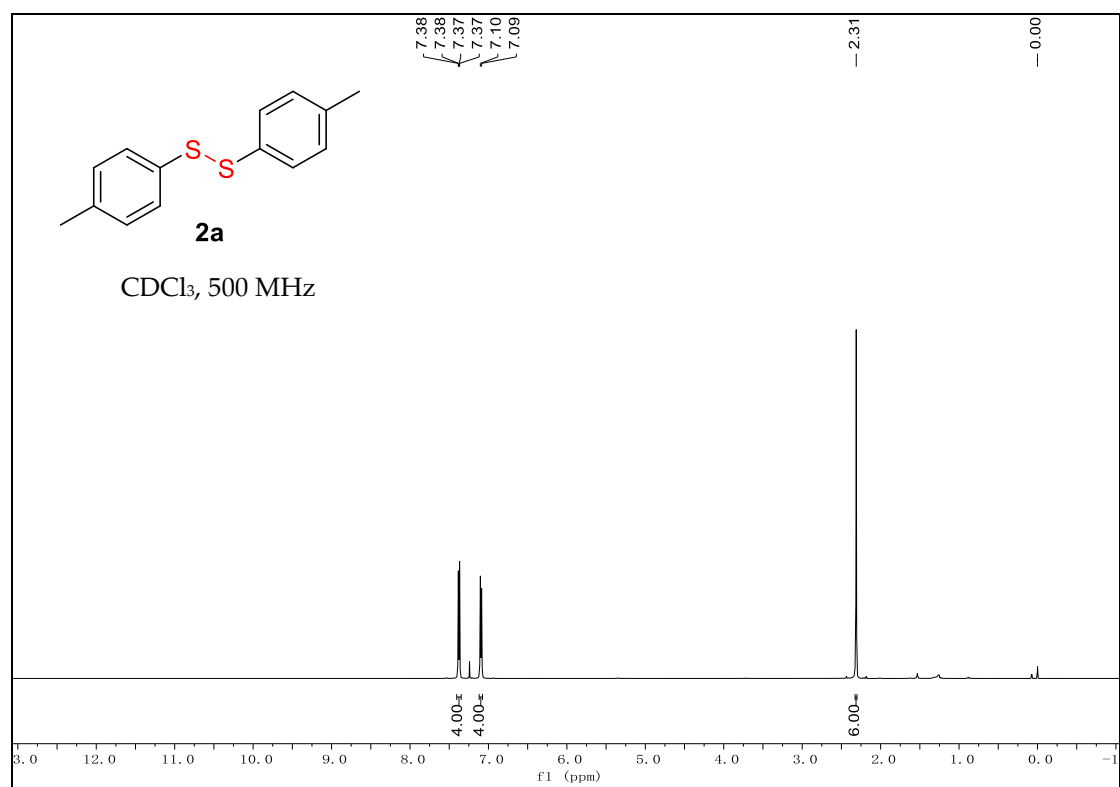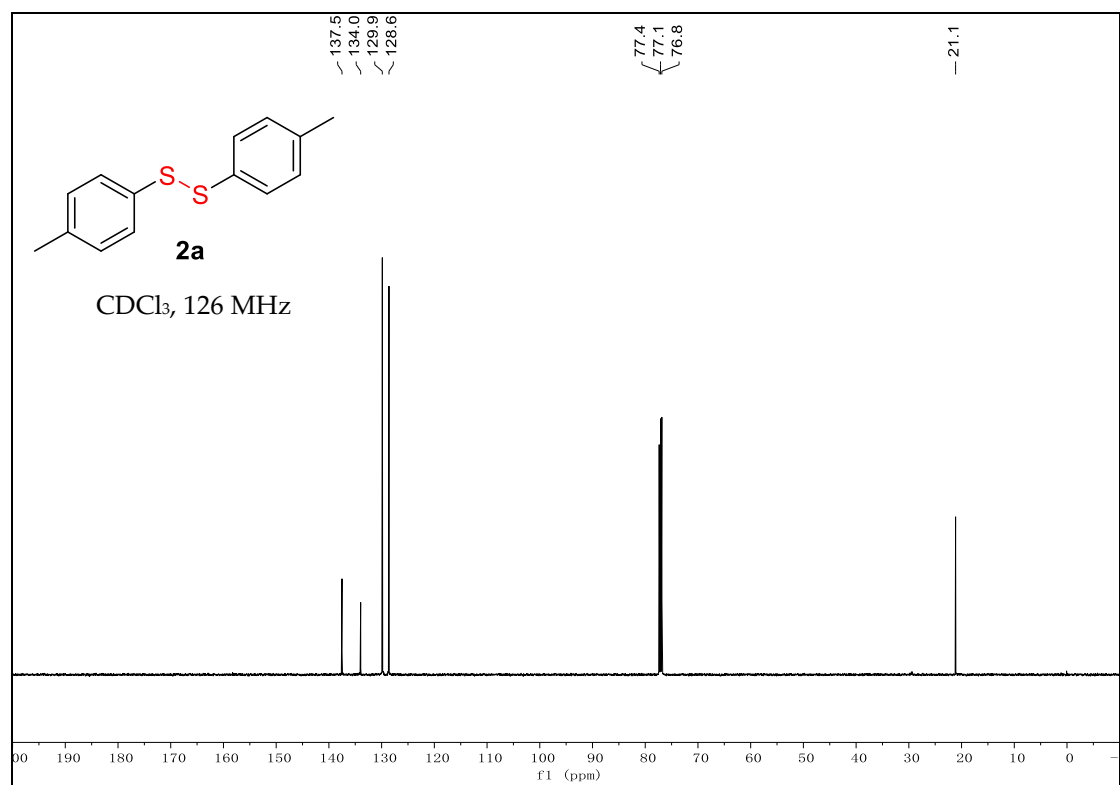

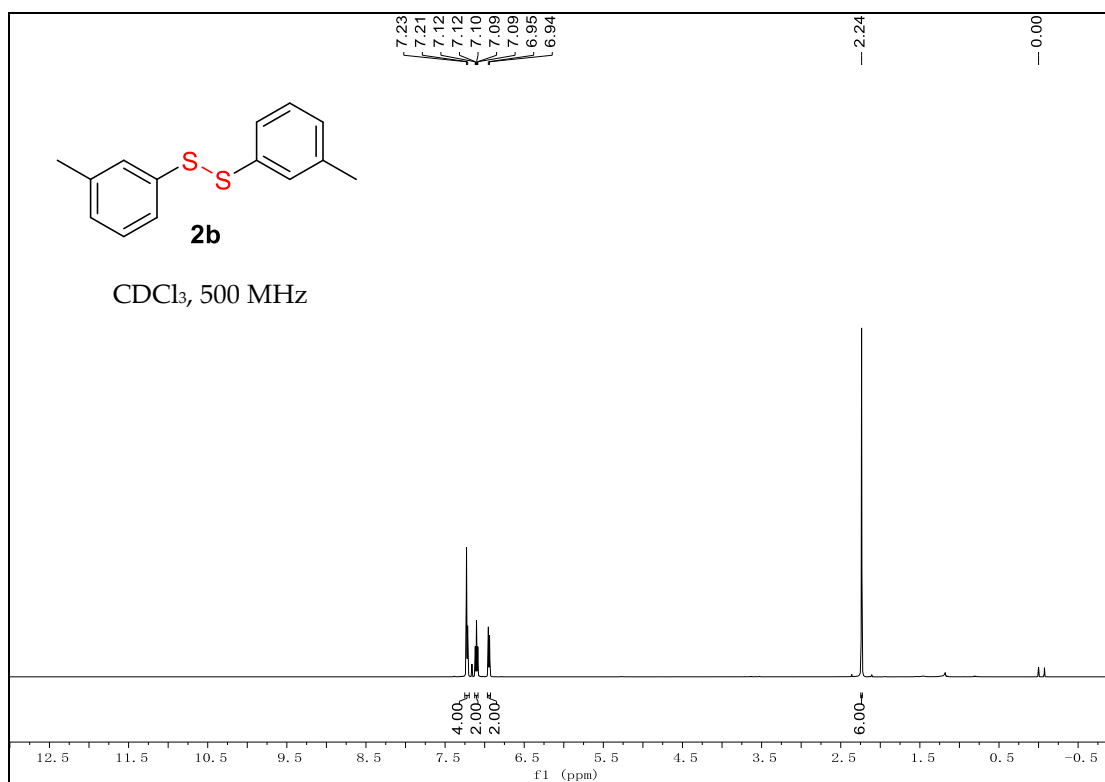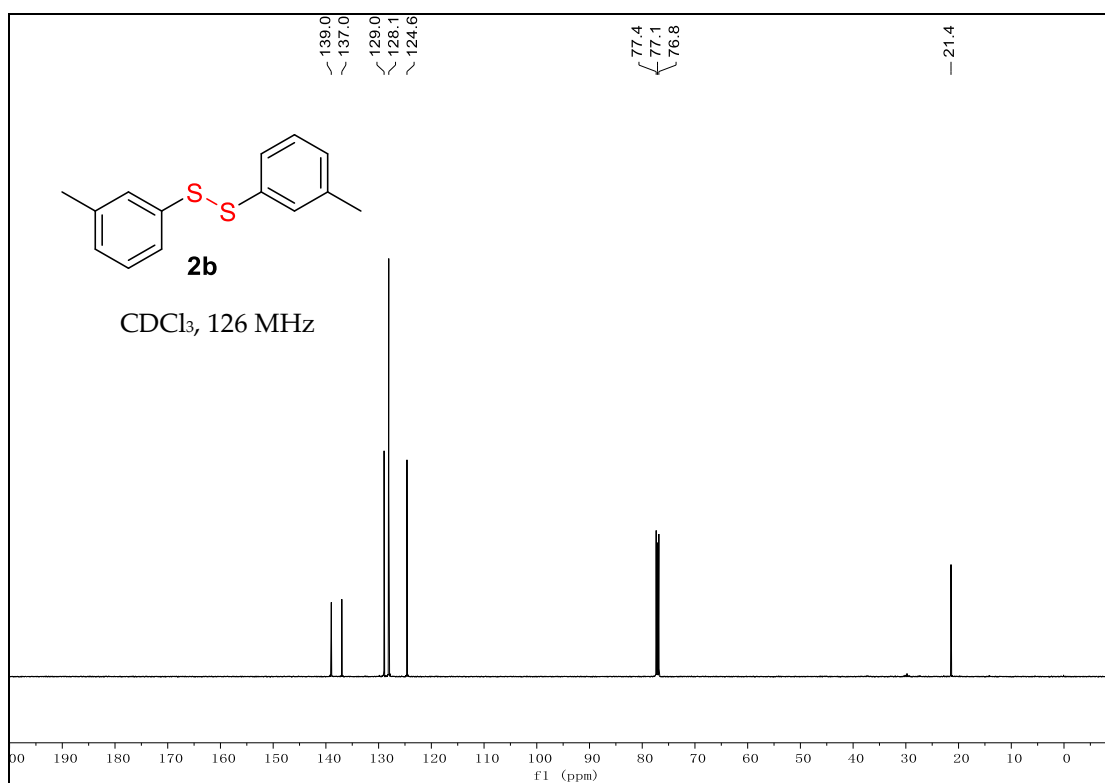

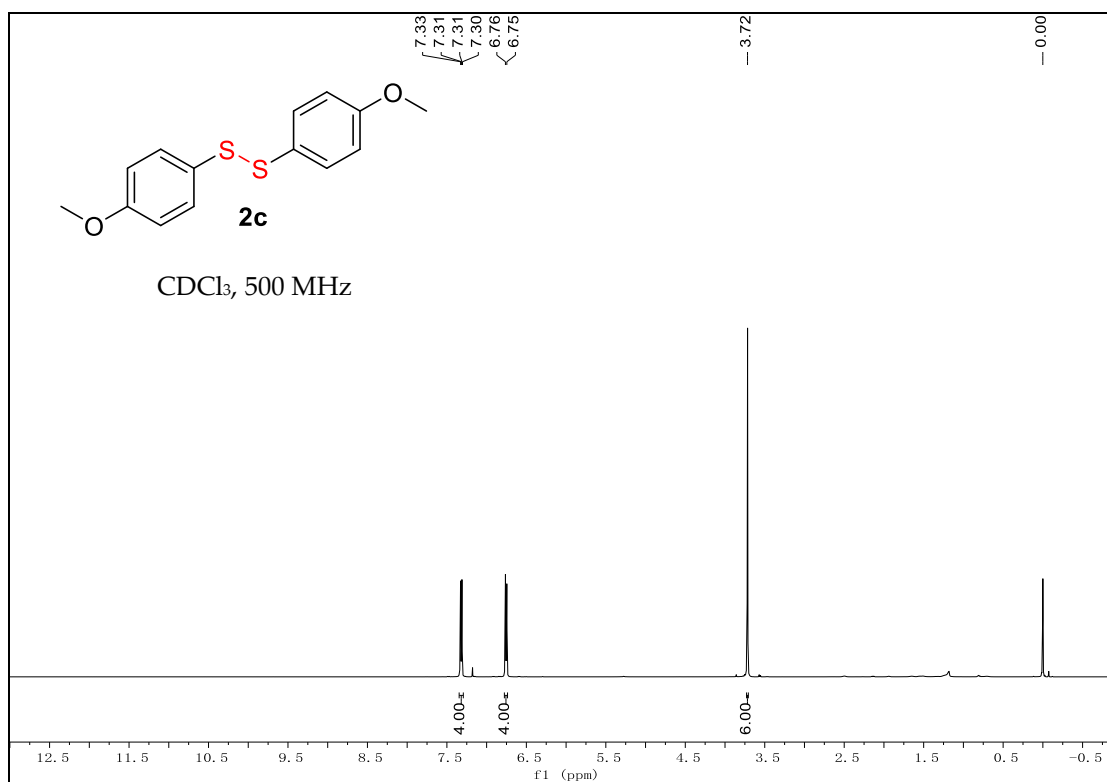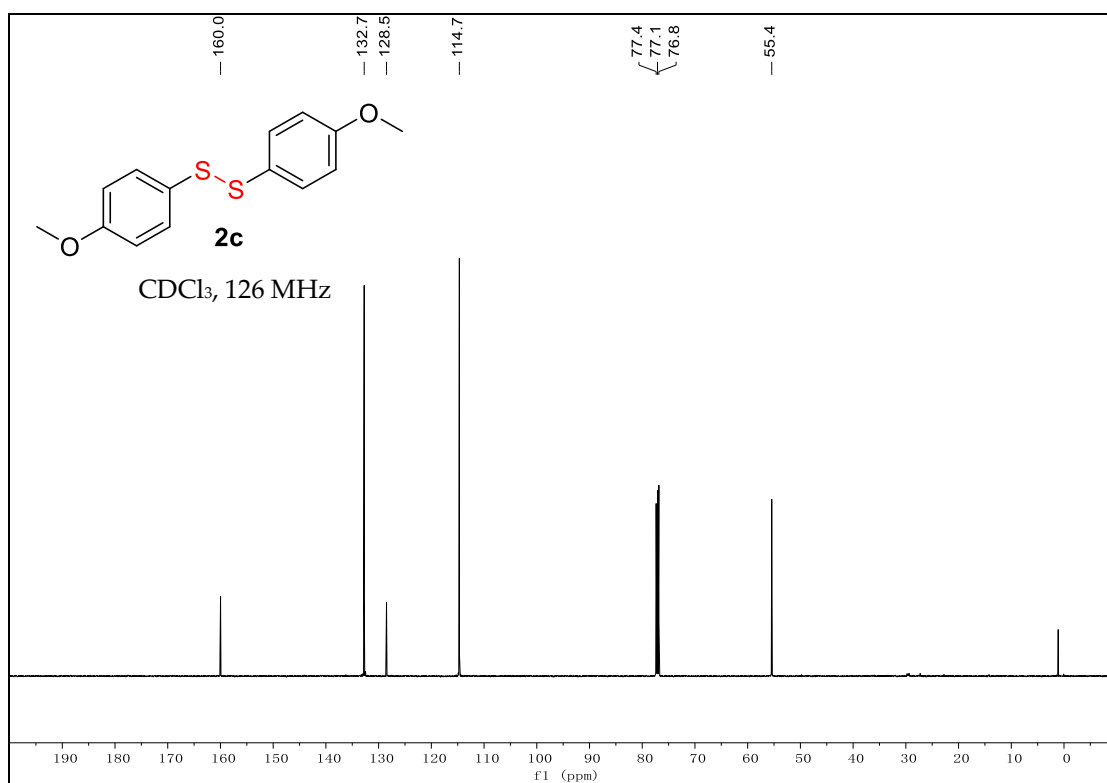

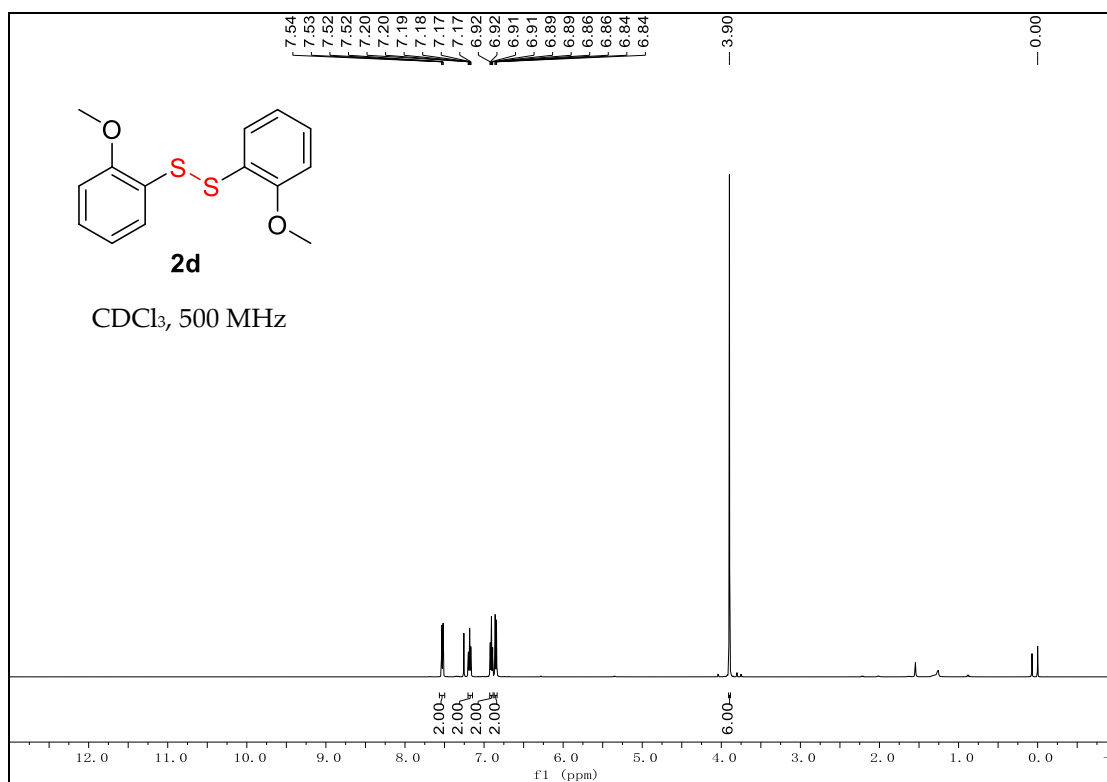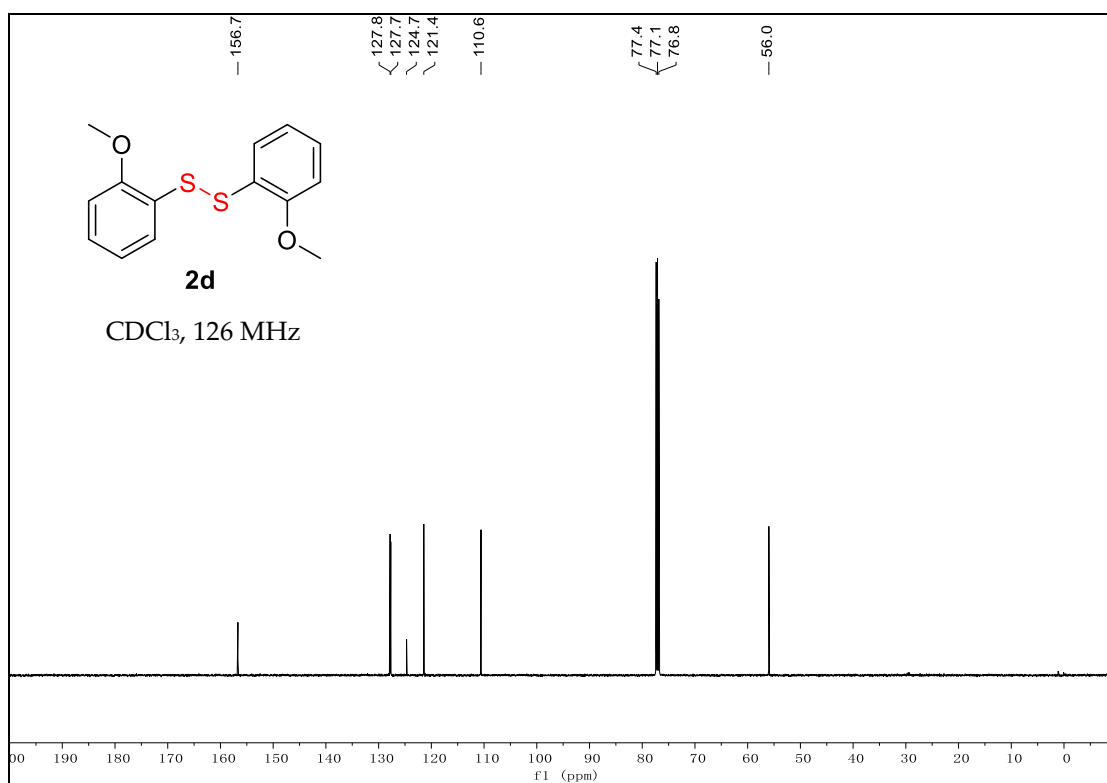

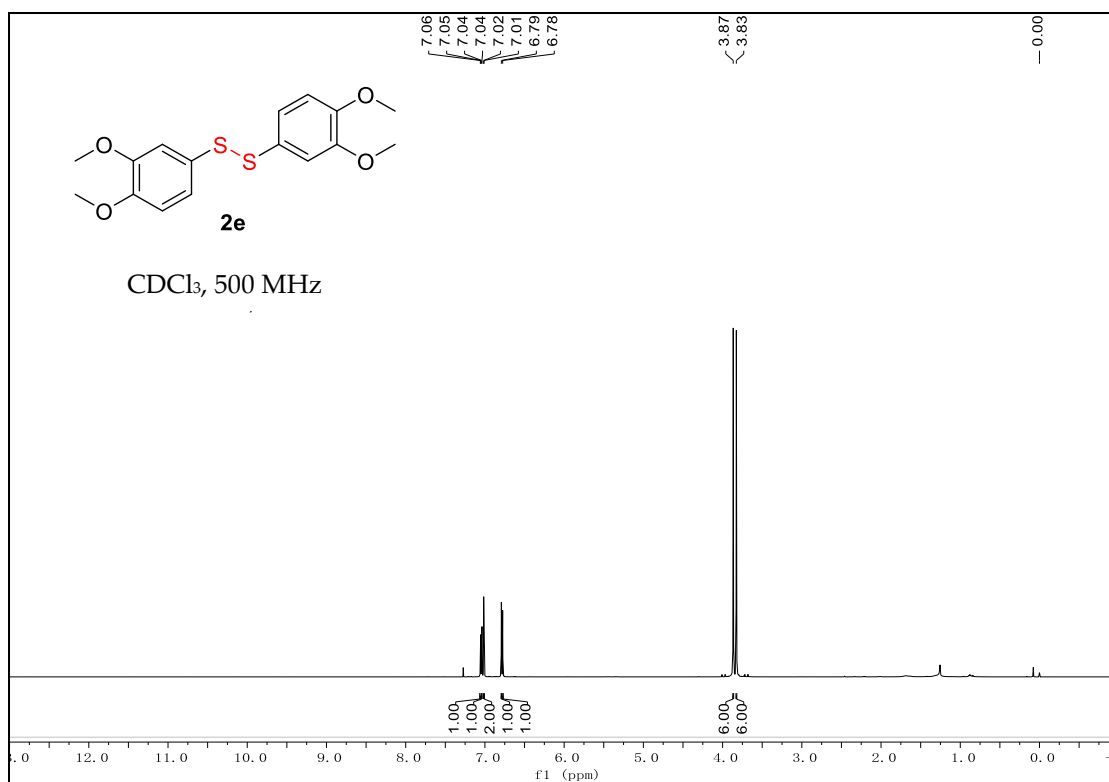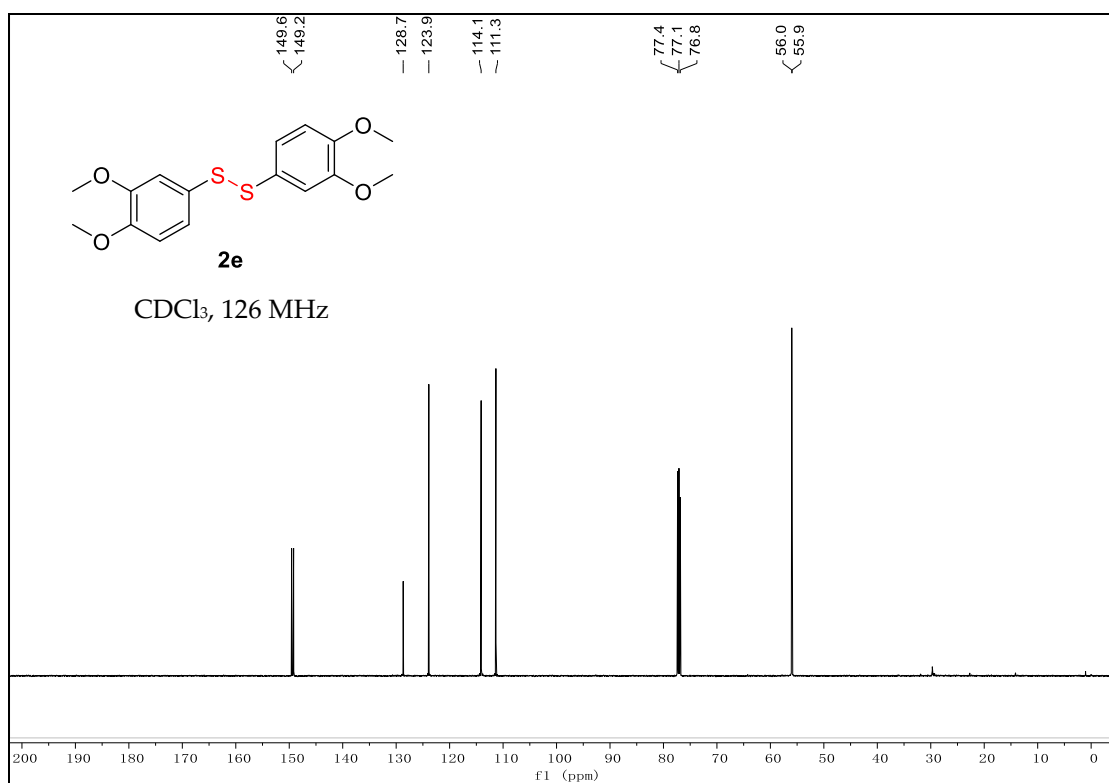

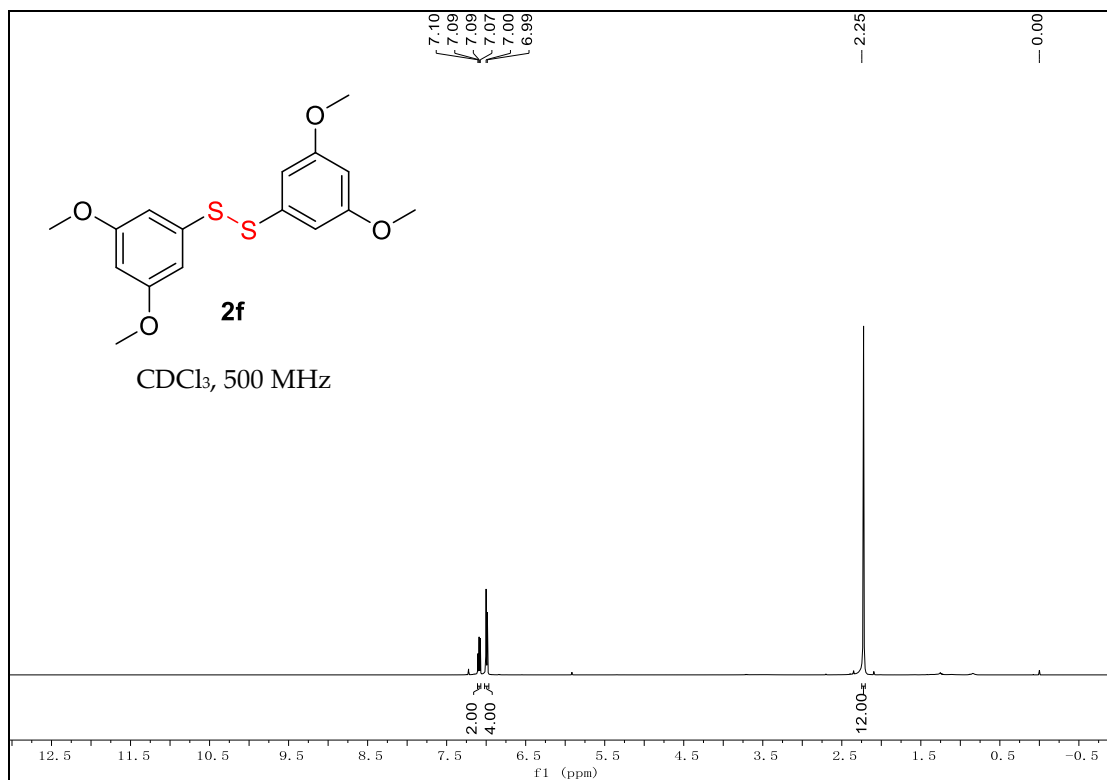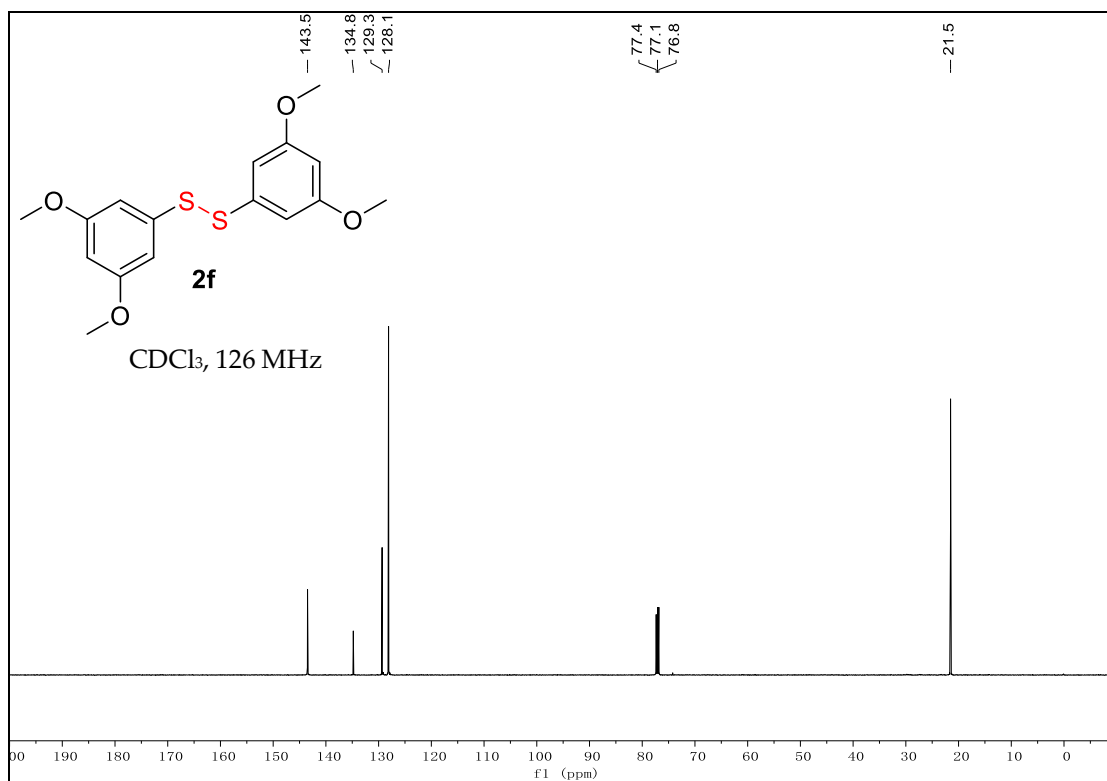

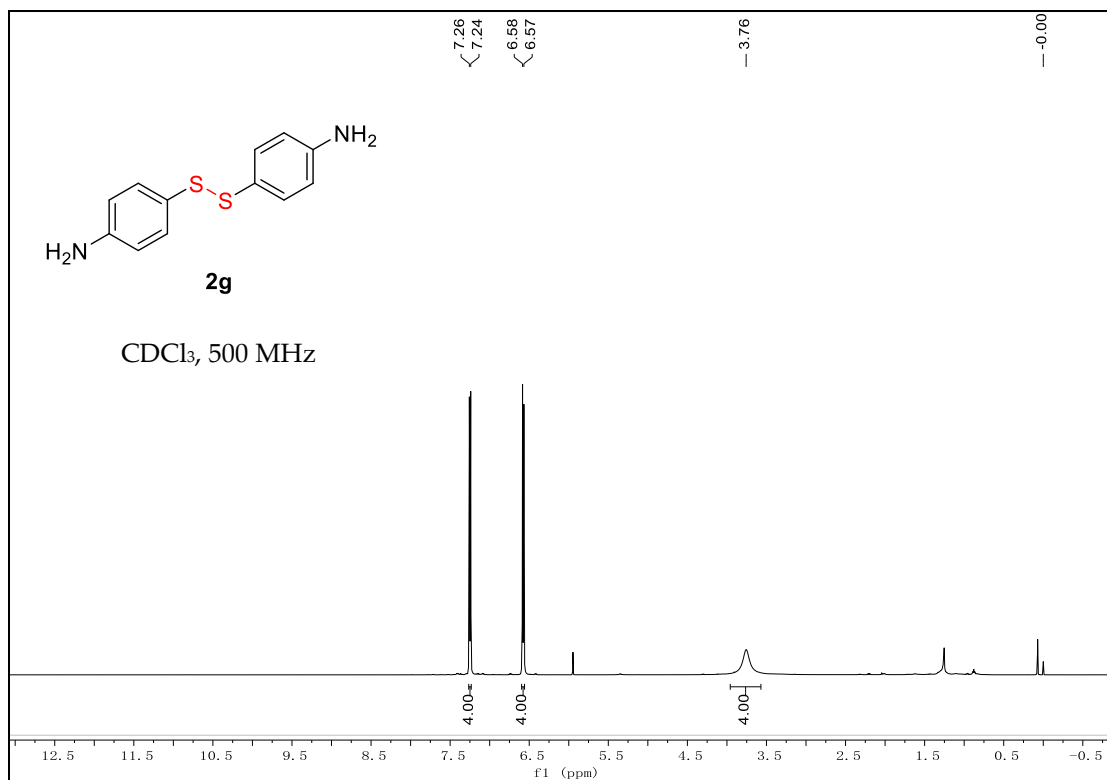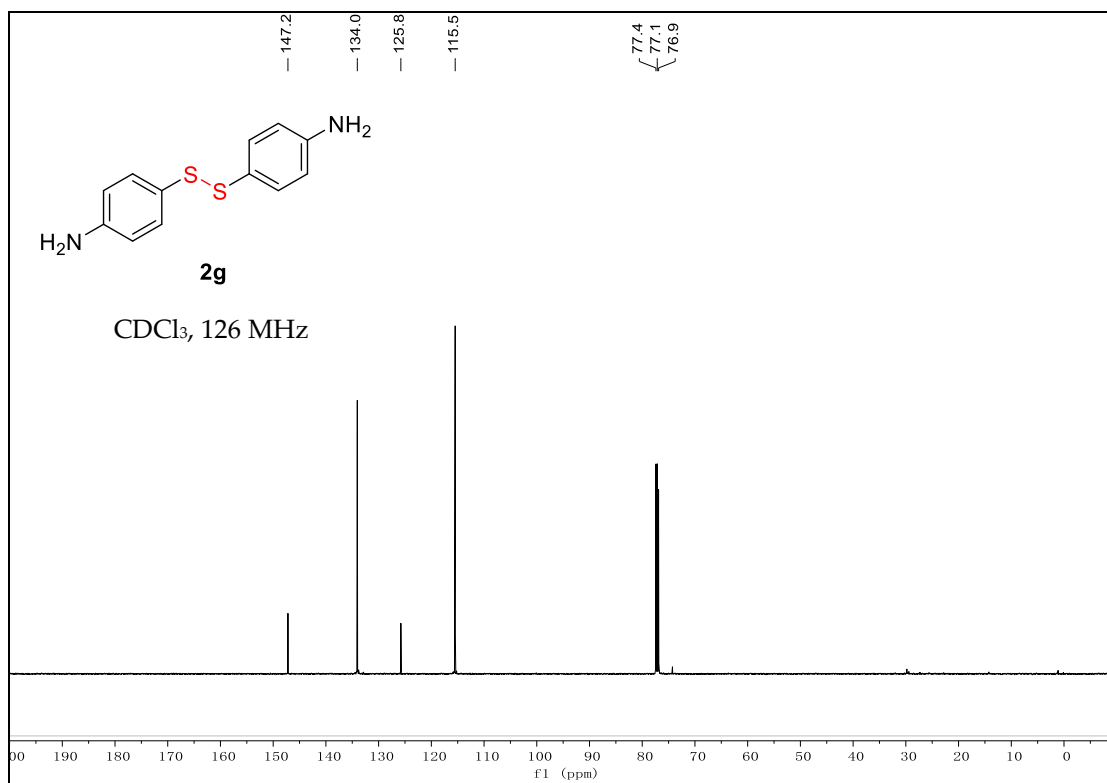



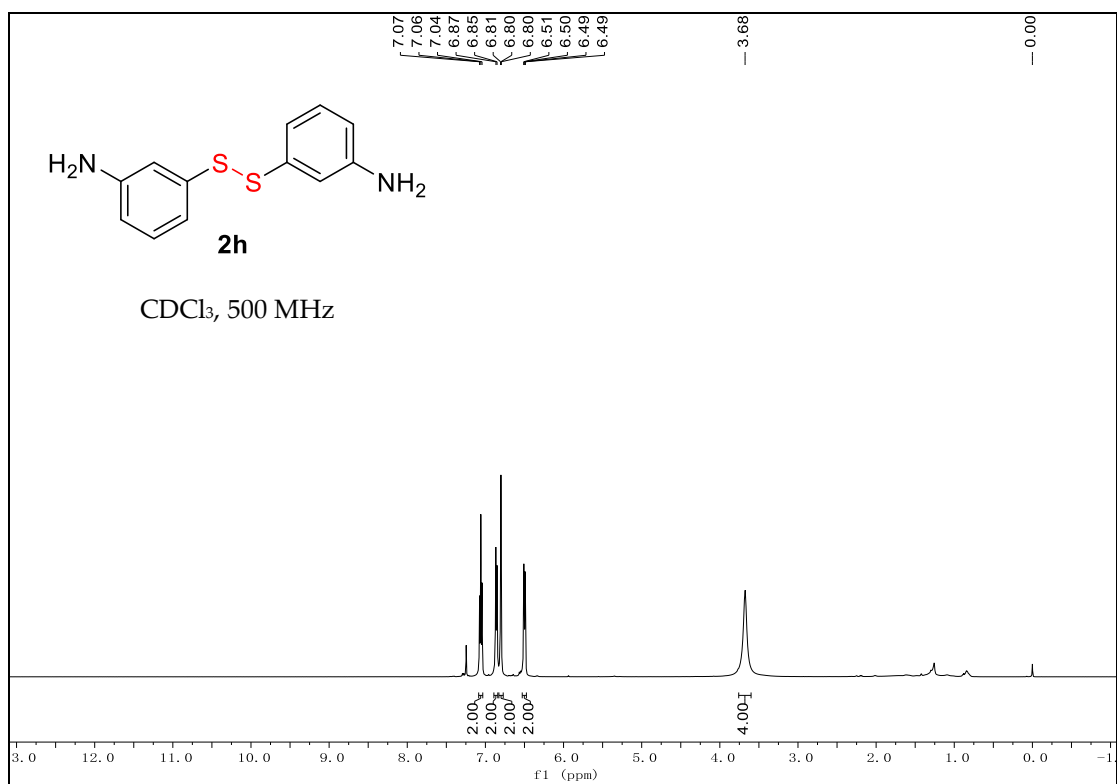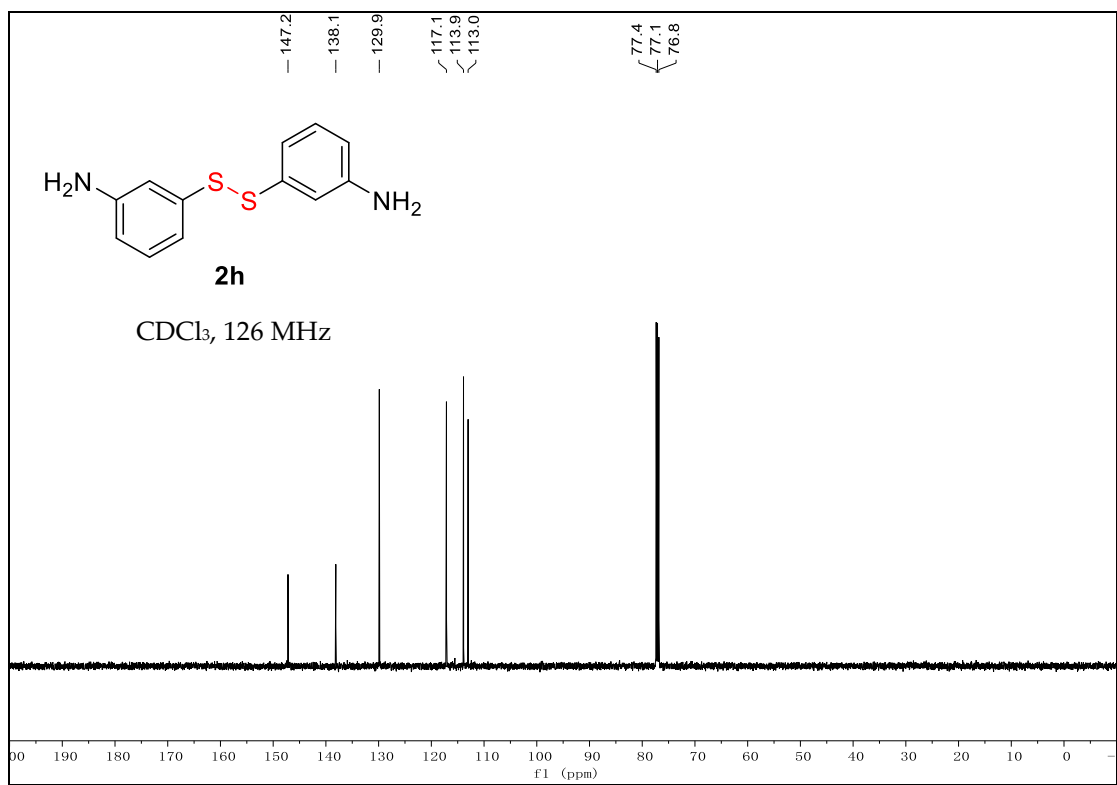

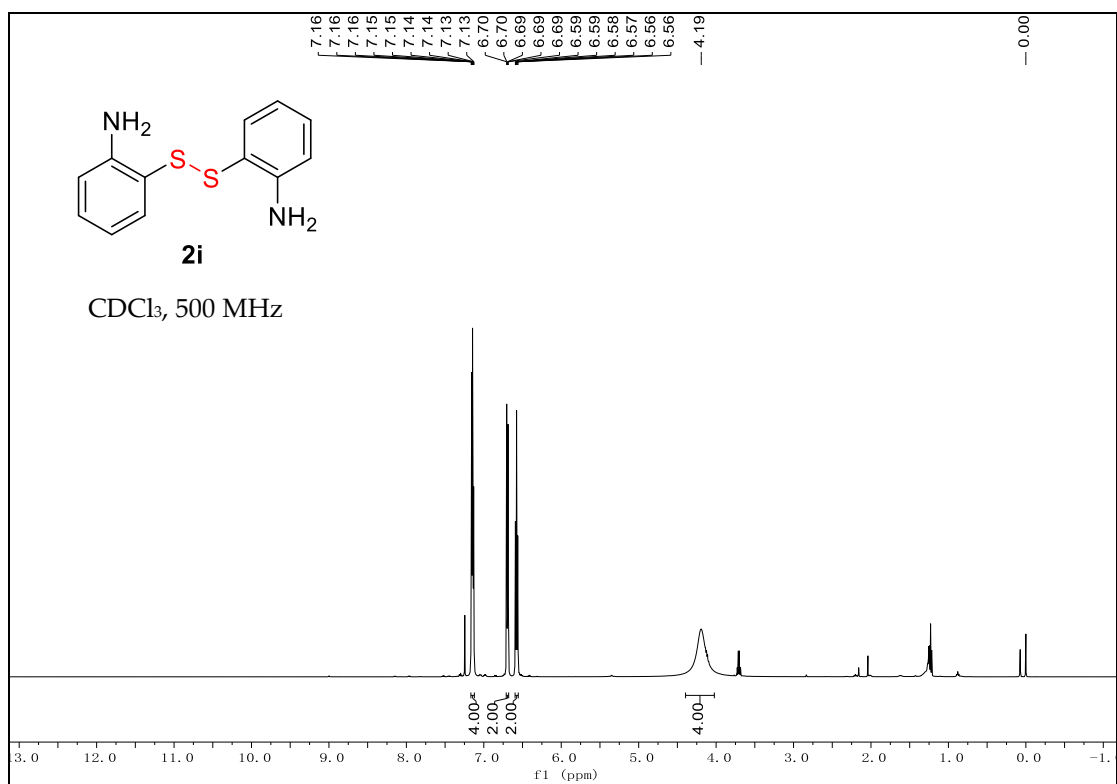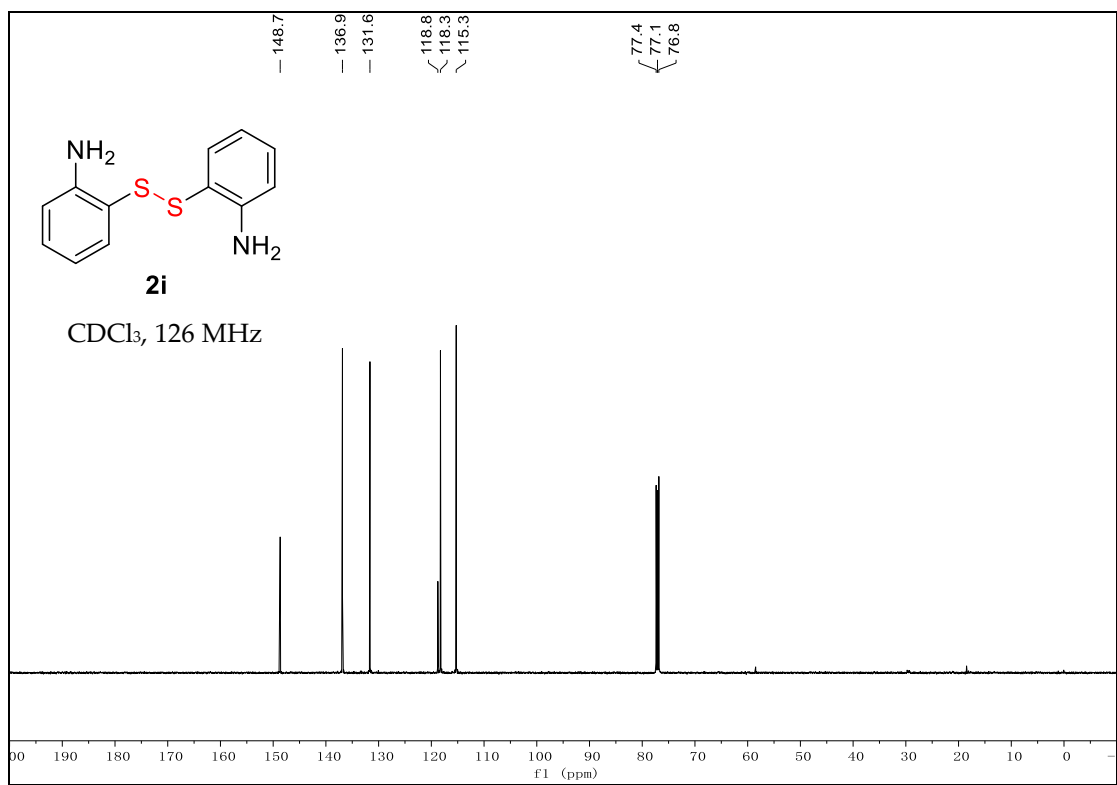

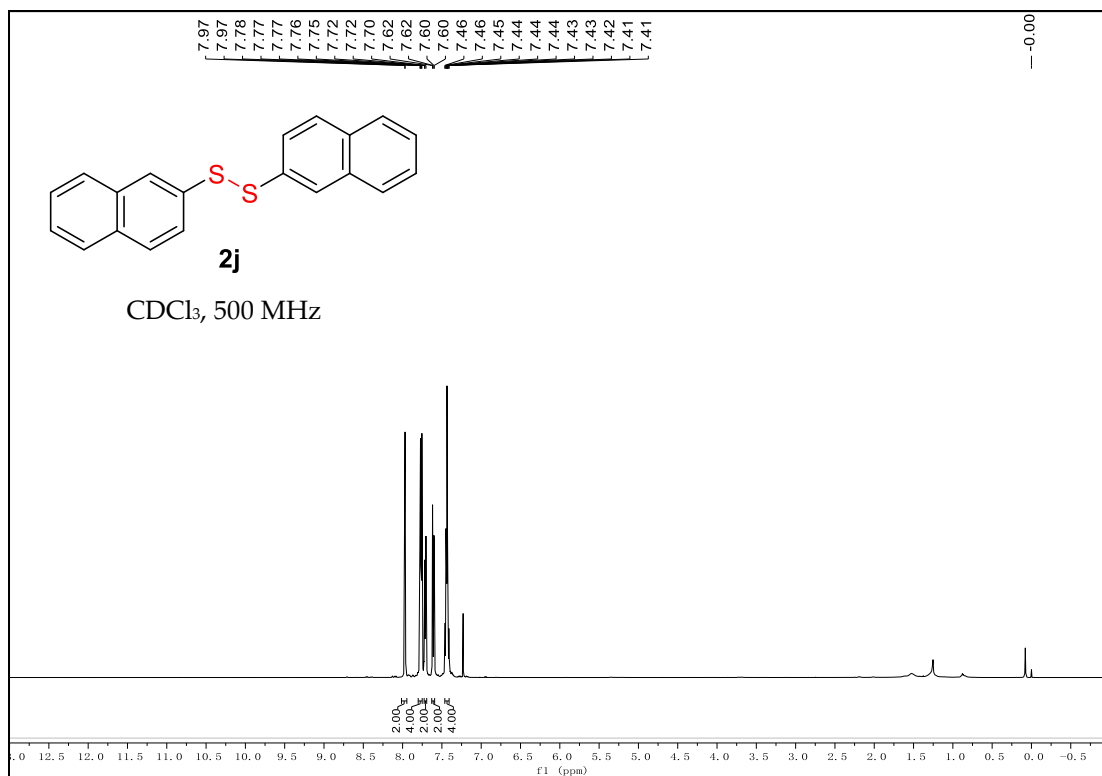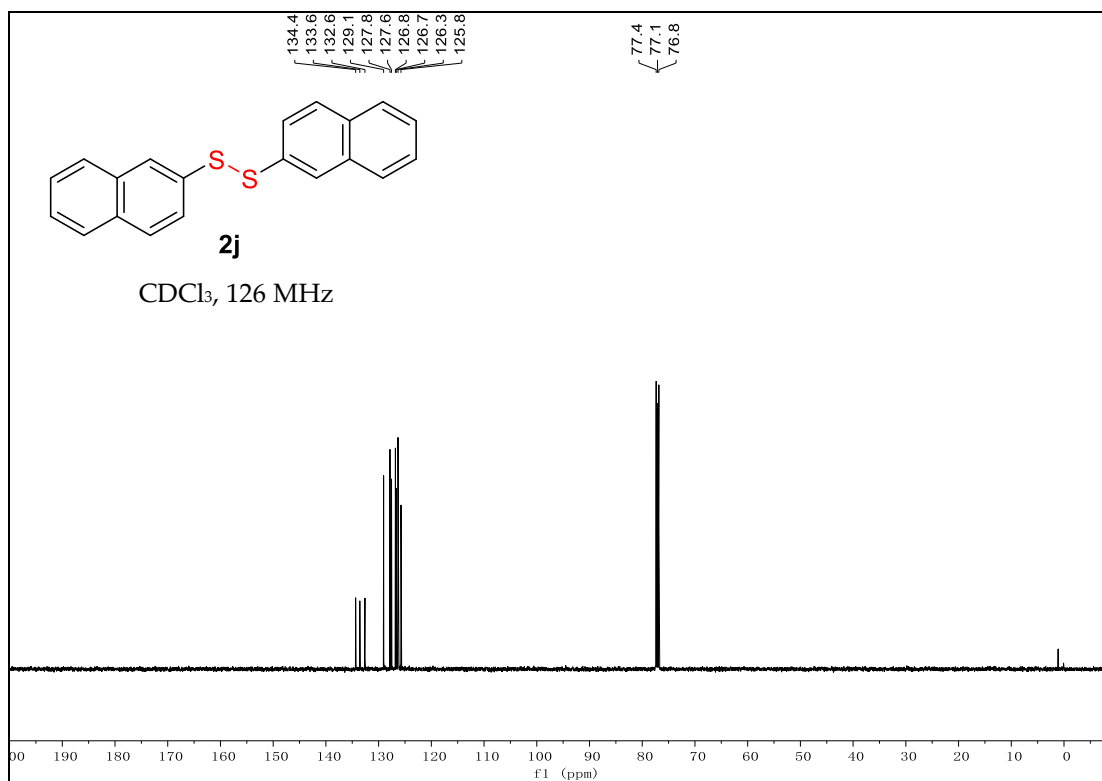

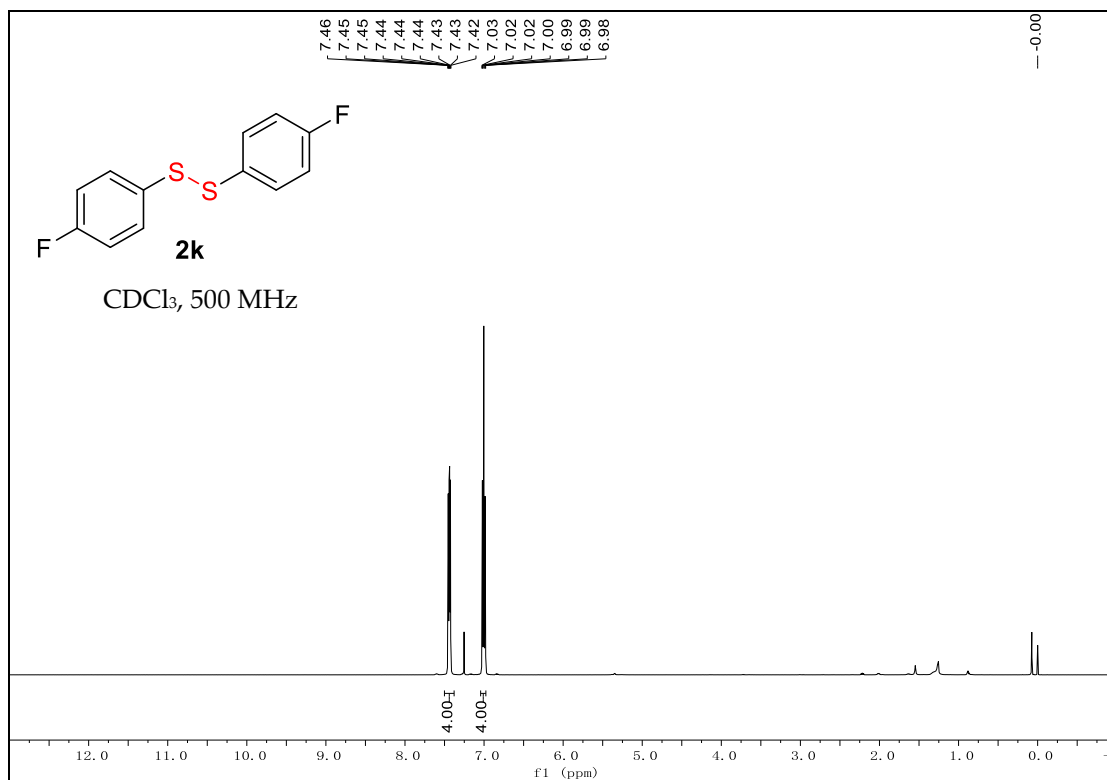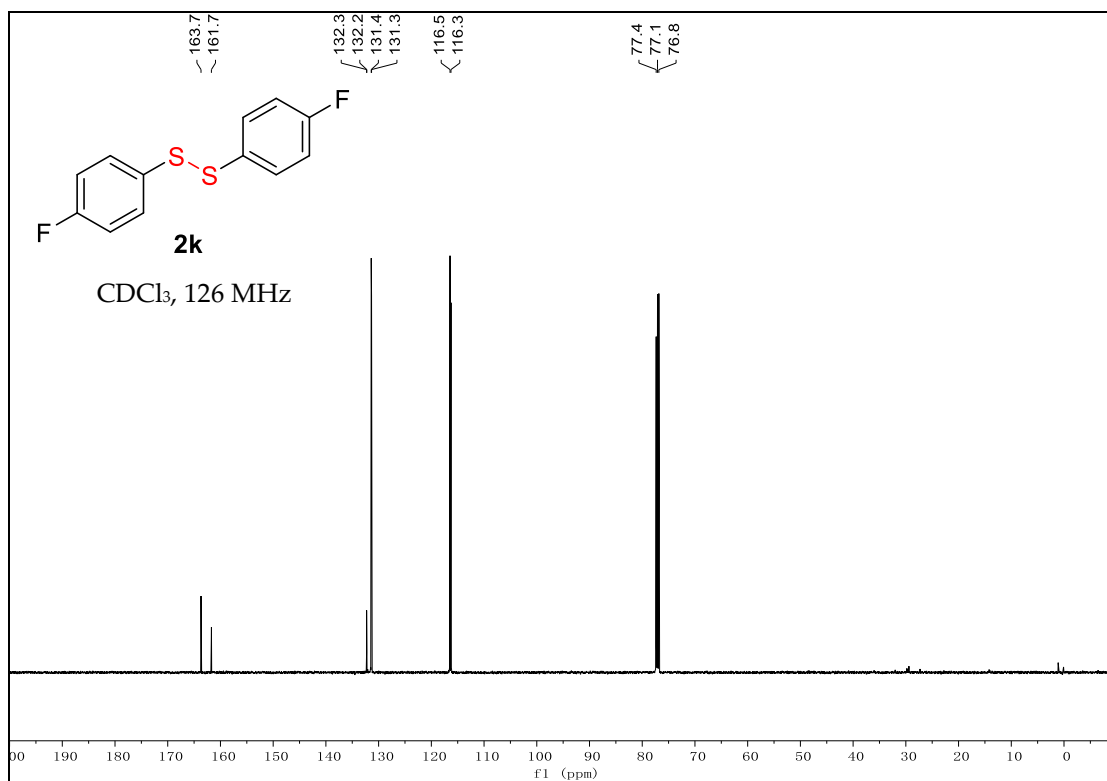

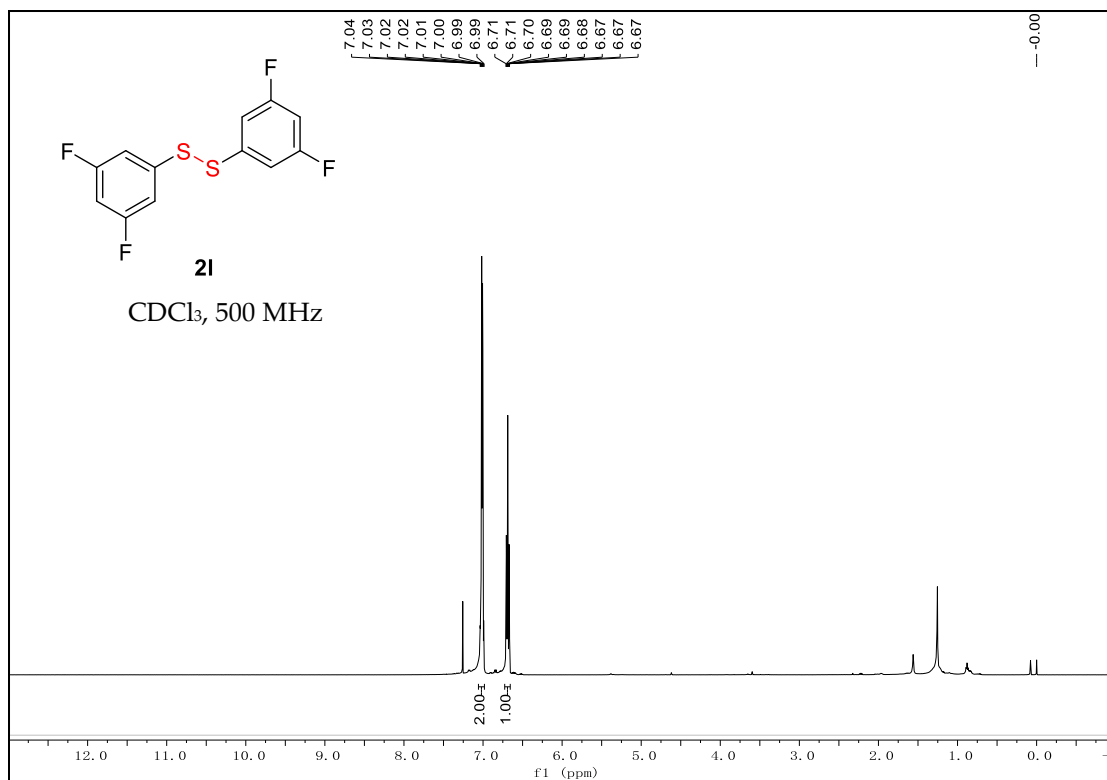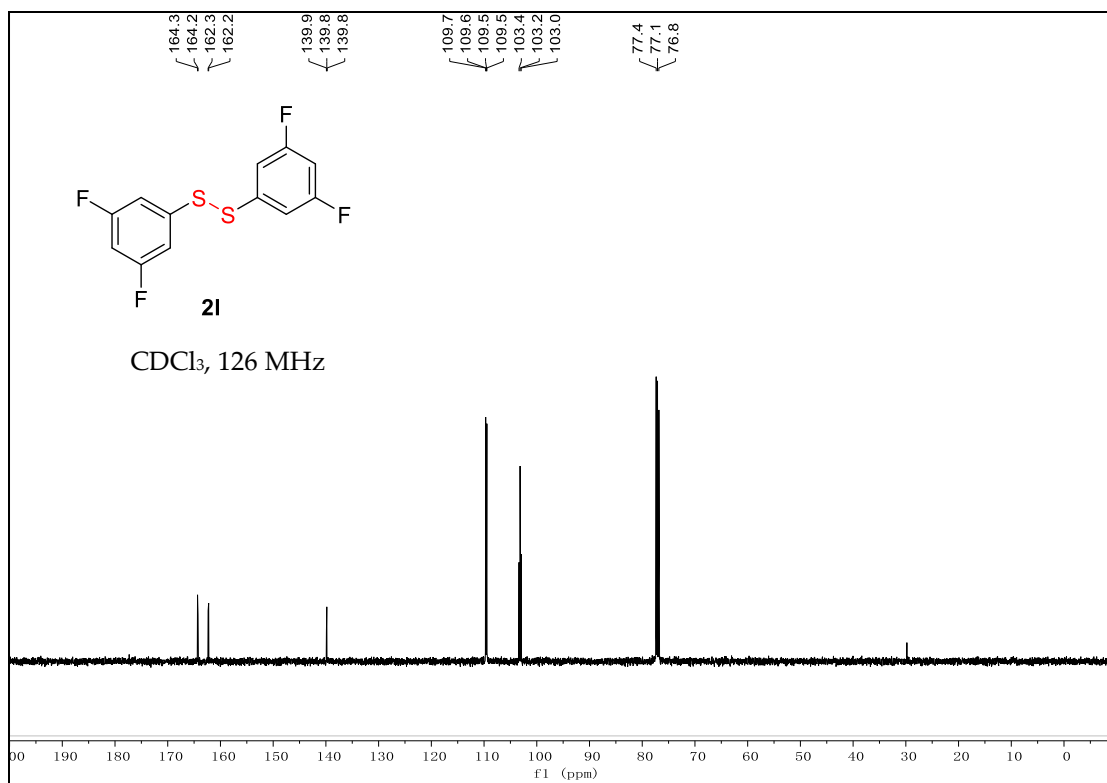

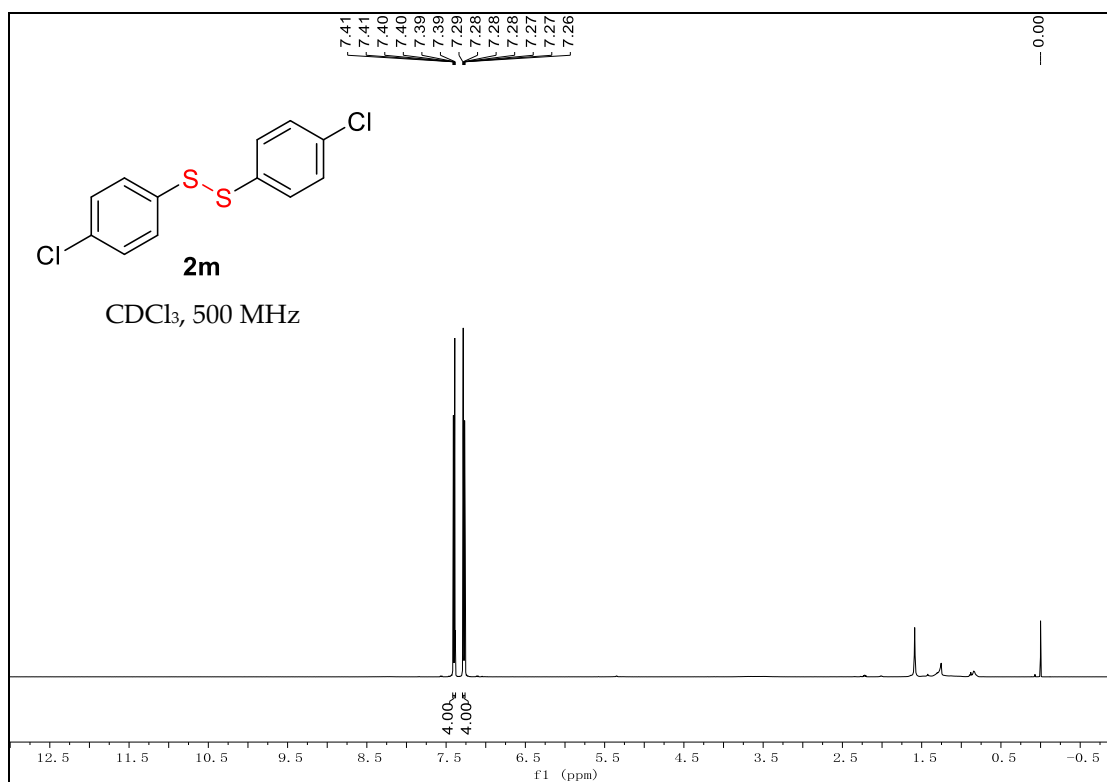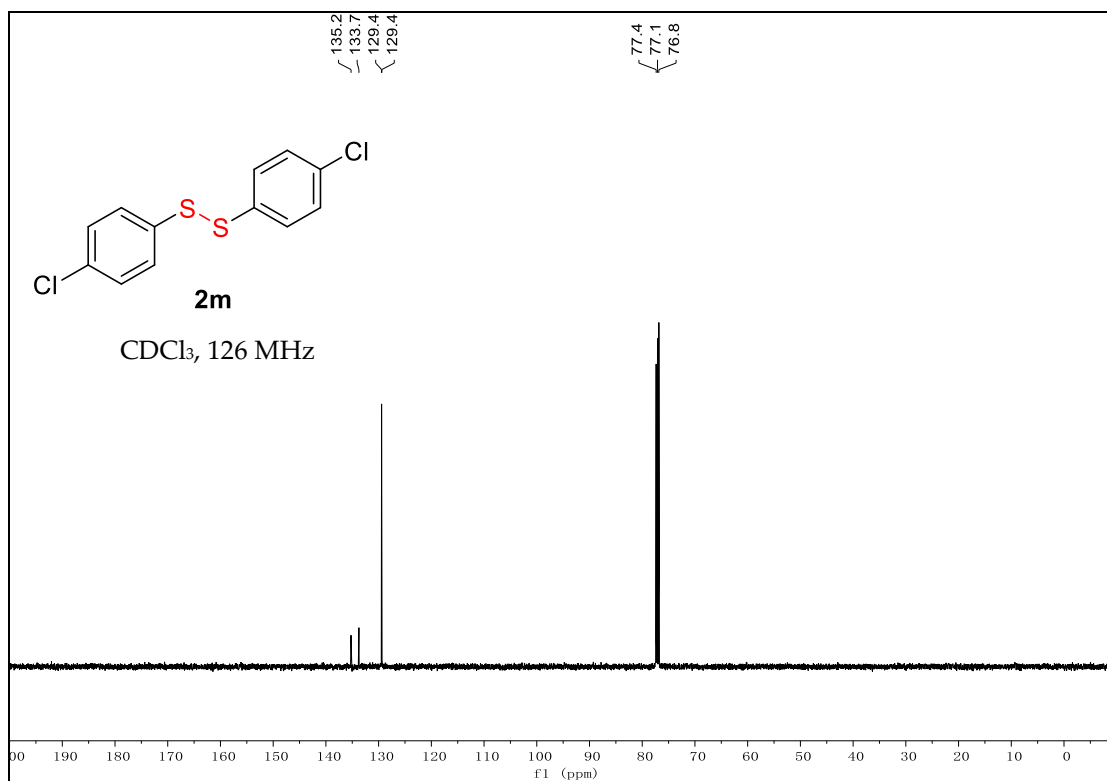

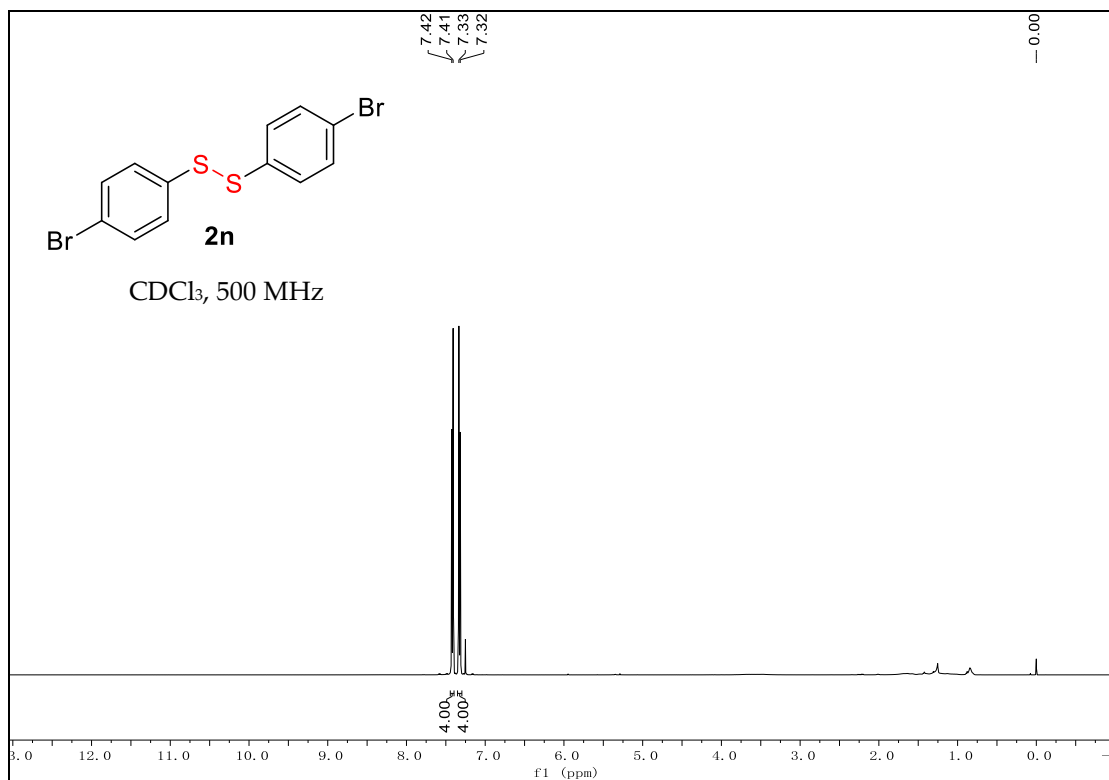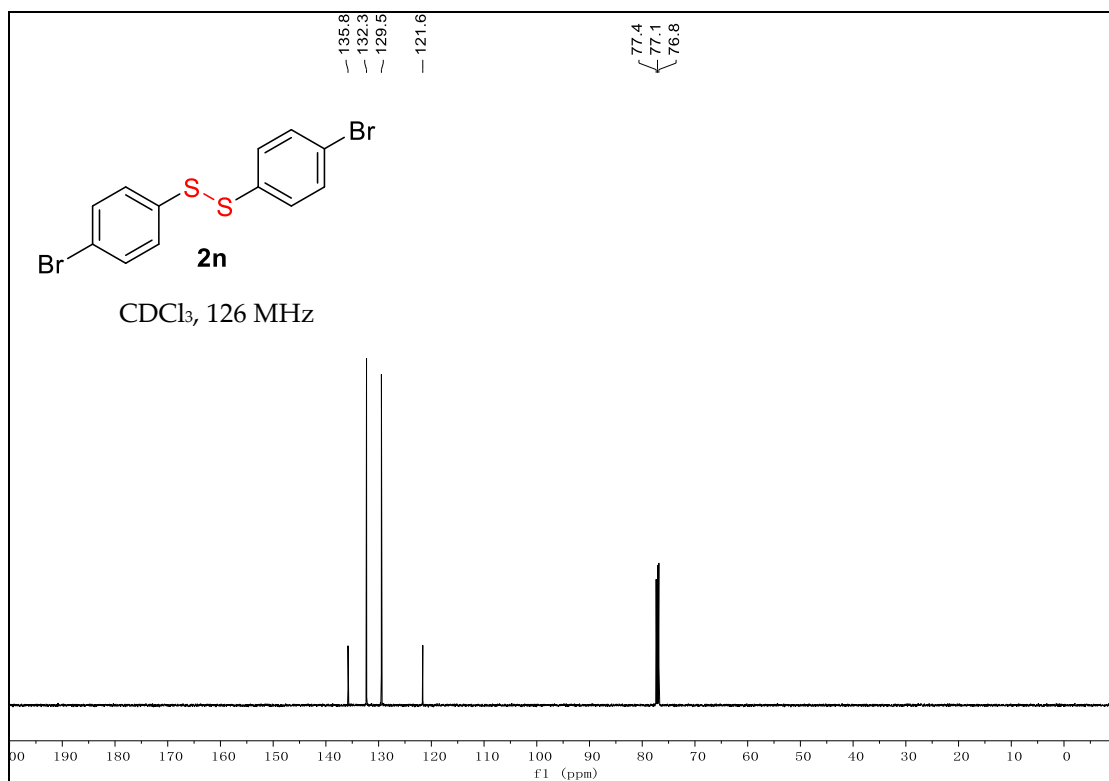

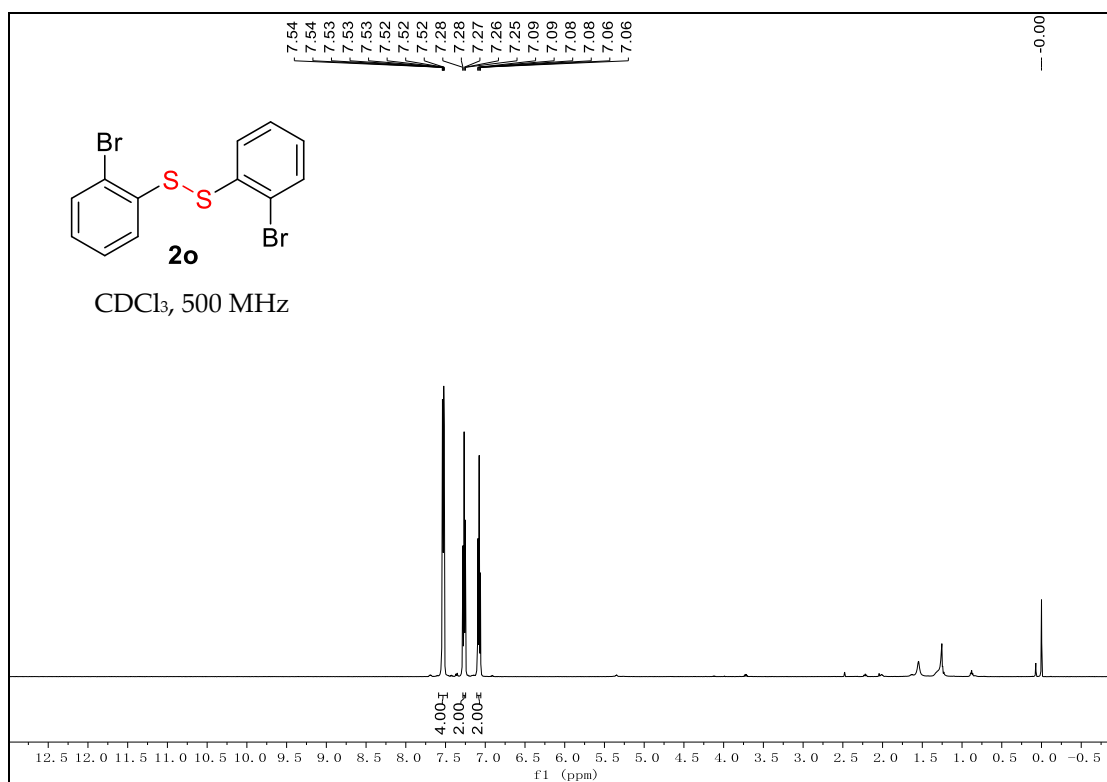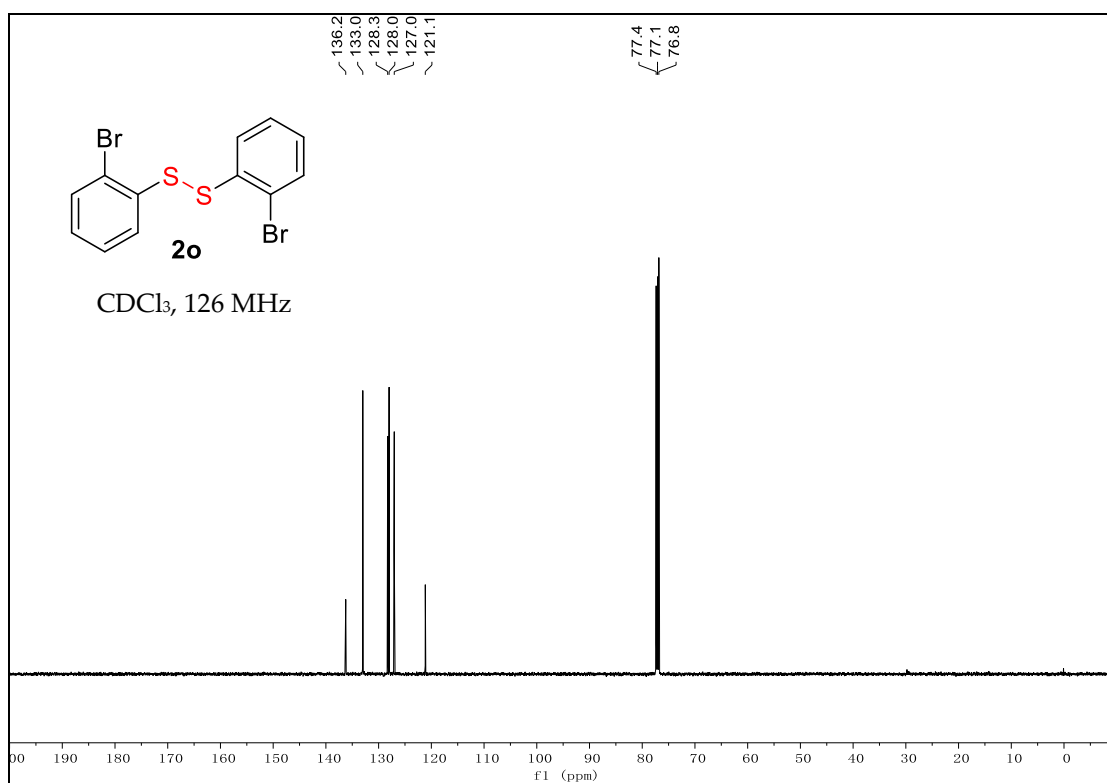



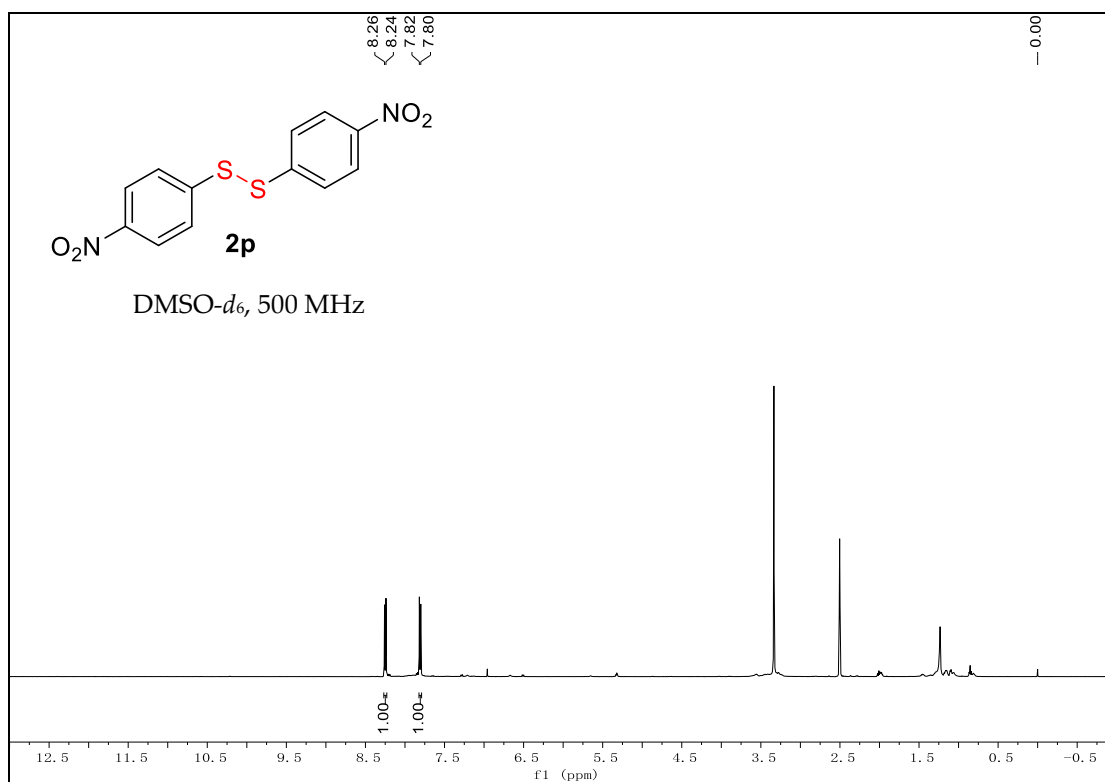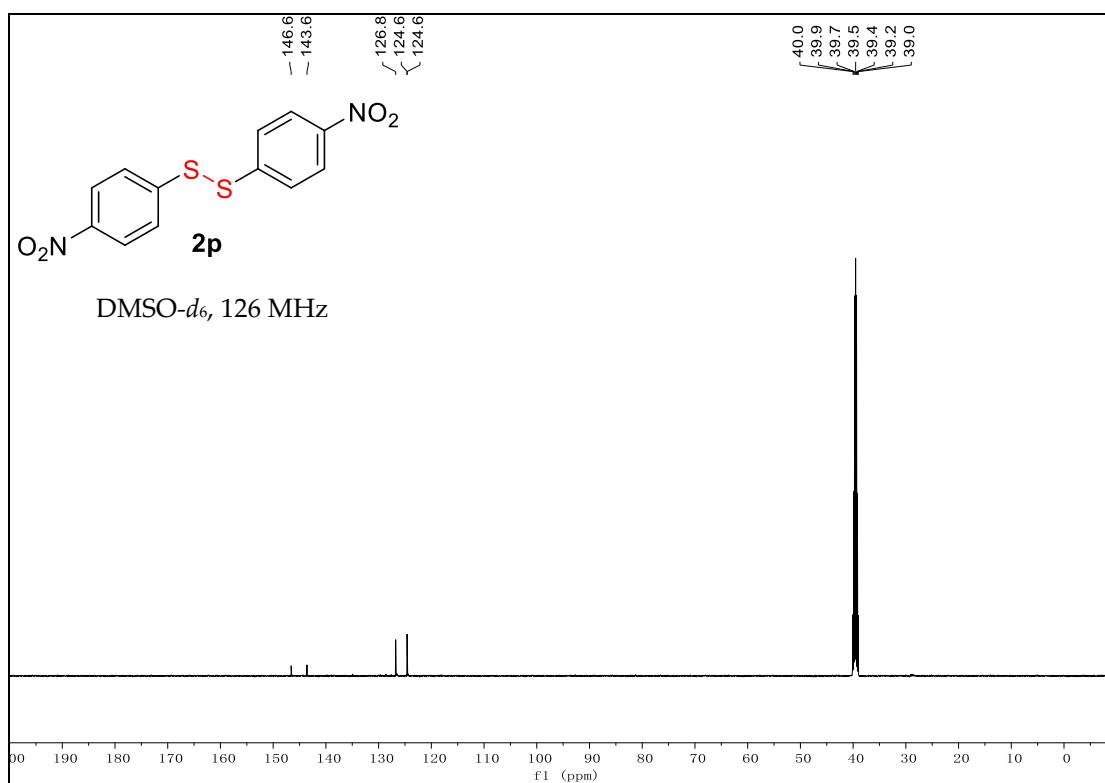

Supplement: s1 [file s1]
